# Supplementary material for: Exploring Environmental Settings to Improve the Printability of Paroxetine-Loaded Filaments by Fused Deposition Modelling
Source: MDPI journal article supplement (doi:10.3390/pharmaceutics15112636), 2023-11-16
Supplement: s1 [file s1]

## Supplementary Material

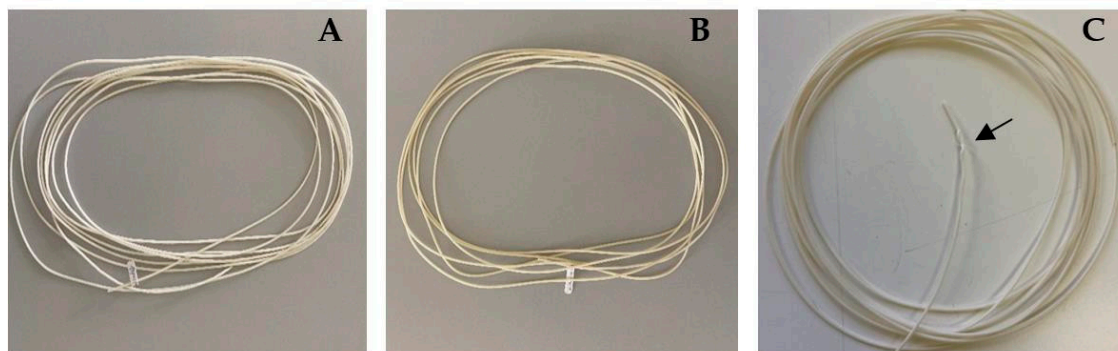

**Figure S1.** Representative images of filaments dried (A) in a hot-air oven (FIL1) and (B) in a microwave oven (FIL2) or (C) stored in a desiccator (FIL3, Reference).

FIL3 could be printed for up to one week of production, since it was too pliable, causing printer defects (indicated by the arrow in a filament used to feed the printer). FIL1 and FIL2 were obtained from physical mixtures prepared immediately before HME (without drying), and both were printable after oven and microwave drying, respectively.

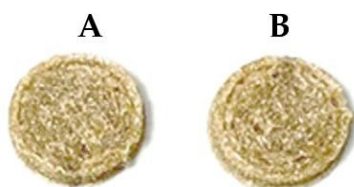

**Figure S2.** Illustrative images of the 3D-printed tablets (A) stored in a desiccator (TAB1) or (B) kept at room conditions (TAB2). Both tablets were obtained from physical mixtures prepared immediately before HME (without drying), and filaments dried in a microwave oven. No significant differences were found between tablets stored at room conditions or controlled atmosphere (desiccator).
